# Supplementary material for: Copper phosphide–phosphorus (Cu3P/P) hybrid nanomaterials: an in situ dioxygen activator in ambient aqueous conditions for advanced oxidation process
Source: Royal Society of Chemistry journal article supplement (doi:10.1039/d3nj01895d), 2023-01-01
Supplement: d3nj01895d1.pdf [file d3nj01895d1.pdf]

## Supplementary material

### Copper phosphide-phosphorus (Cu<sub>3</sub>P/P) hybrid nanomaterials: an in-situ dioxygen activator in ambident aqueous condition for advanced oxidation process

Jiaojiao Hu,<sup>a</sup> Guoxi Deng,<sup>a</sup> Jiayi Ru,<sup>a</sup> Xiaodan Chen<sup>\*a,b</sup>

\*Corresponding authors

<sup>a</sup>Guangdong Provincial Key Laboratory of Functional Supramolecular Coordination Materials and Applications, College of Chemistry and Materials Science, College of Chemistry and Materials Science, Jinan University, Guangzhou 510632, China

<sup>b</sup>International Innovation Center for Forest Chemicals and Materials, Nanjing Forestry University, Nanjing 210037, China

E-mail: chxdlzhsh@jnu.edu.cn

#### Chemicals and reagents:

Whahaha's bottled water was used as the ultrapure water (UPW) for all the reactions. SMX (purity > 99%), polyvinylpyrrolidone (PVP), p-benzoquinone (BQ) were provided by Macklin Reagent Co., Ltd (Shanghai, China). Copper(I) iodide (CuI), red phosphorus (P), sodium (Na), diethyl carbonate (DEC), sodium bicarbonate (NaHCO<sub>3</sub>), sodium chloride (NaCl), sodium acetate (NaOAc) and catalase (Cat) were purchased from Aladdin Reagent Co., Ltd (Shanghai, China). Nitroblue tetrazolium (NBT) and N, N-diethyl-1, 4-phenylenediamine (DPD) were bought from TCI (Shanghai) Development Co. Ltd. Coumarin was purchased from Energy Chemical (Shanghai, China). 5,5-dimethyl-1-pyrroline N-oxide (DMPO) was bought from DOJINDO (Japan). Acetonitrile and methanol (HPLC grade) were supplied by Sigma Aldrich (St. Louis, MO, USA). All other reagents were of analytical grade, which were purchased from Tianjin Chemical Reagents Company (Tianjin, China). All the chemical reagents except sodium phosphathynolate (NaOCP) were used directly as we received. Sodium phosphathynolate (NaOCP) was prepared according to the procedure reported in the literatures.<sup>1</sup>

This supplementary information (SI) contains one table, four figures, and this cover page.

**Table S1.** Reaction of NaOCP with CuI as a copper source under different synthesis conditions

| CuI:NaOCP Ratio | Solvent    | stabilizer | Temperature      | Reaction time | Results |
|-----------------|------------|------------|------------------|---------------|---------|
| 1:1             | UPW        | CTAB       | Room temperature | 12 h          | ×       |
| 1:3             | UPW        | CTAB       | Room temperature | 12 h          | ×       |
| 1:6             | UPW        | CTAB       | Room temperature | 12 h          | ×       |
| 1:3             | Oleylamine | CTAB       | Room temperature | 12 h          | ×       |
| 1:3             | Oleylamine | CTAB       | 60 °C            | 12 h          | ×       |
| 1:3             | Oleylamine | CTAB       | 100 °C           | 12 h          | ×       |
| 1:3             | THF        | CTAB       | Room temperature | 12 h          | ×       |
| 1:3             | THF        | CTAB       | 60 °C            | 12 h          | ×       |
| 1:3             | THF        | CTAB       | 100 °C           | 12 h          | ×       |
| 1:3             | UPW        | PEG        | Room temperature | 12 h          | ×       |
| 1:3             | UPW        | PEG        | 60 °C            | 12 h          | ×       |
| 1:3             | UPW        | PEG        | 100 °C           | 12 h          | ×       |
| 1:3             | UPW        | PVP        | Room temperature | 12 h          | ×       |
| 1:3             | UPW        | PVP        | 60 °C            | 12 h          | ×       |
| 1:3             | UPW        | PVP        | 100 °C           | 12 h          | ✓       |
| 1:3             | UPW        | PVP        | 100 °C           | 8 h           | ✓       |

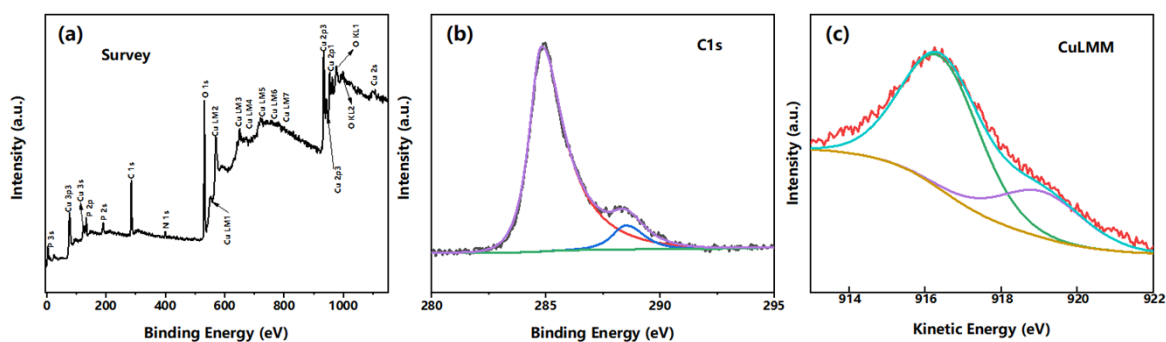

**Fig. S1.** The XPS spectrum of Cu<sub>3</sub>P/P : (a) survey spectra (b) C1s peaks (c) Auger spectrum of Cu.

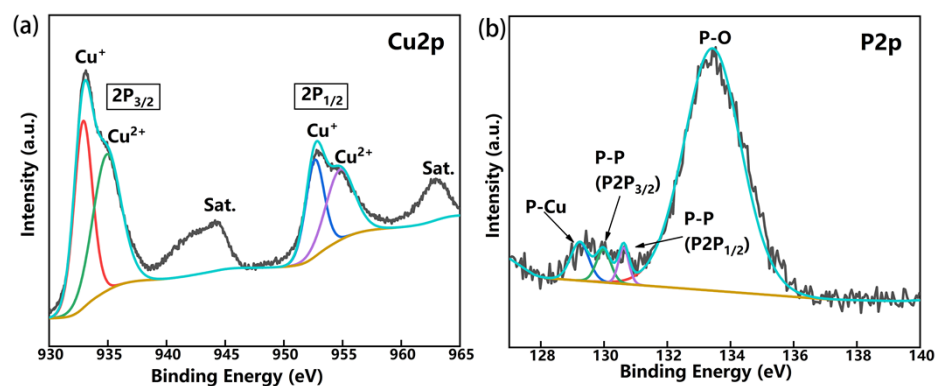

**Fig. S2.** XPS spectra of  $\text{Cu}_3\text{P}/\text{P}$  after the degradation in pH3 conditions corresponding to Cu 2p (a) and P2p (b).  
Reaction conditions:  $[\text{SMX}] = 18 \text{ mg/L}$   $[\text{Cu}_3\text{P}/\text{P}] = 120 \text{ mg/L}$ .

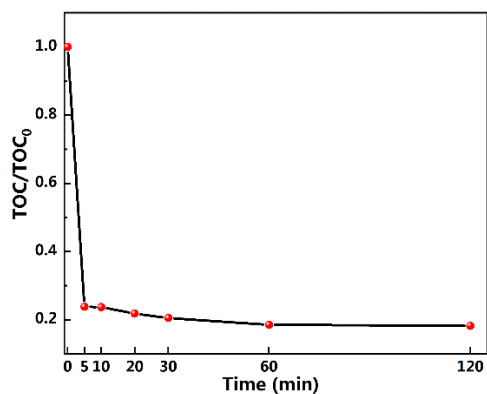

**Fig. S3.** Mineralization degree of SMX in  $\text{Cu}_3\text{P}/\text{P}$  UPW suspension. Experimental condition:  $[\text{Cu}_3\text{P}/\text{P}] = 60 \text{ mg/L}$ ,  $[\text{SMX}] = 18 \text{ mg/L}$ ,  $[\text{TOC}]_0 = 10 \text{ mg/L}$ .

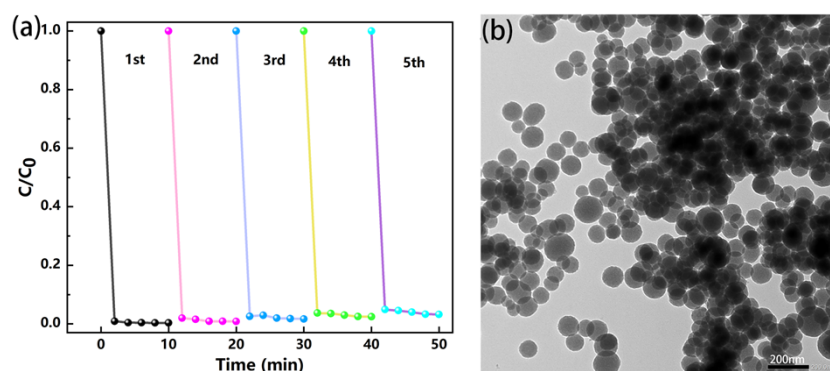

**Fig. S4.** (a) Degradation of SMX during five different batch runs using  $\text{Cu}_3\text{P}/\text{P}$ , (b) TEM images of  $\text{Cu}_3\text{P}/\text{P}$  nanoparticle after five degradation cycles. Reaction conditions:  $[\text{SMX}] = 18 \text{ mg/L}$   $[\text{Cu}_3\text{P}/\text{P}] = 120 \text{ mg/L}$ .

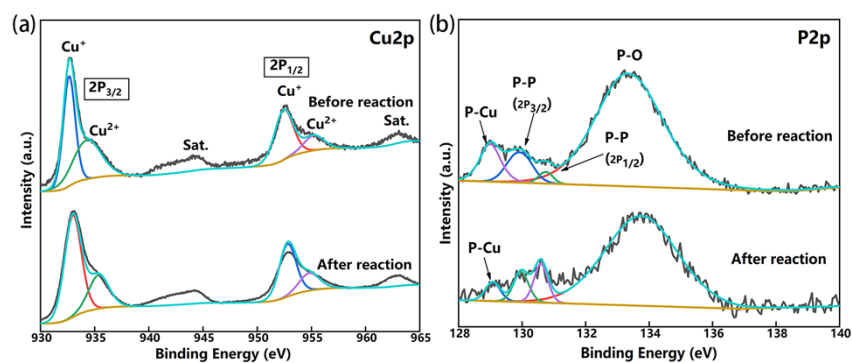

**Fig. S5.** XPS spectra of Cu<sub>3</sub>P/P before and after five degradation cycles corresponding to Cu 2p (a) and P2p (b). Reaction conditions: [SMX] = 18 mg/L [Cu<sub>3</sub>P/P] = 120 mg/L.

1 F. F. Puschmann, D. Stein, D. Heift, C. Hendriksen, Z. A. Gal, H.-F. Grützmacher and H. Grützmacher, *Angew. Chem. Int. Ed.*, 2011, **50**, 8420–8423.
